# Supplementary material for: Structural evidence for the facile chelate-ring opening reactions of novel platinum(ii)–pyridine carboxamide complexes
Source: Royal Society of Chemistry journal article supplement (doi:10.1039/b108378n), 2002-01-01
Supplement: b108378n.doc [file b108378n.doc]

**
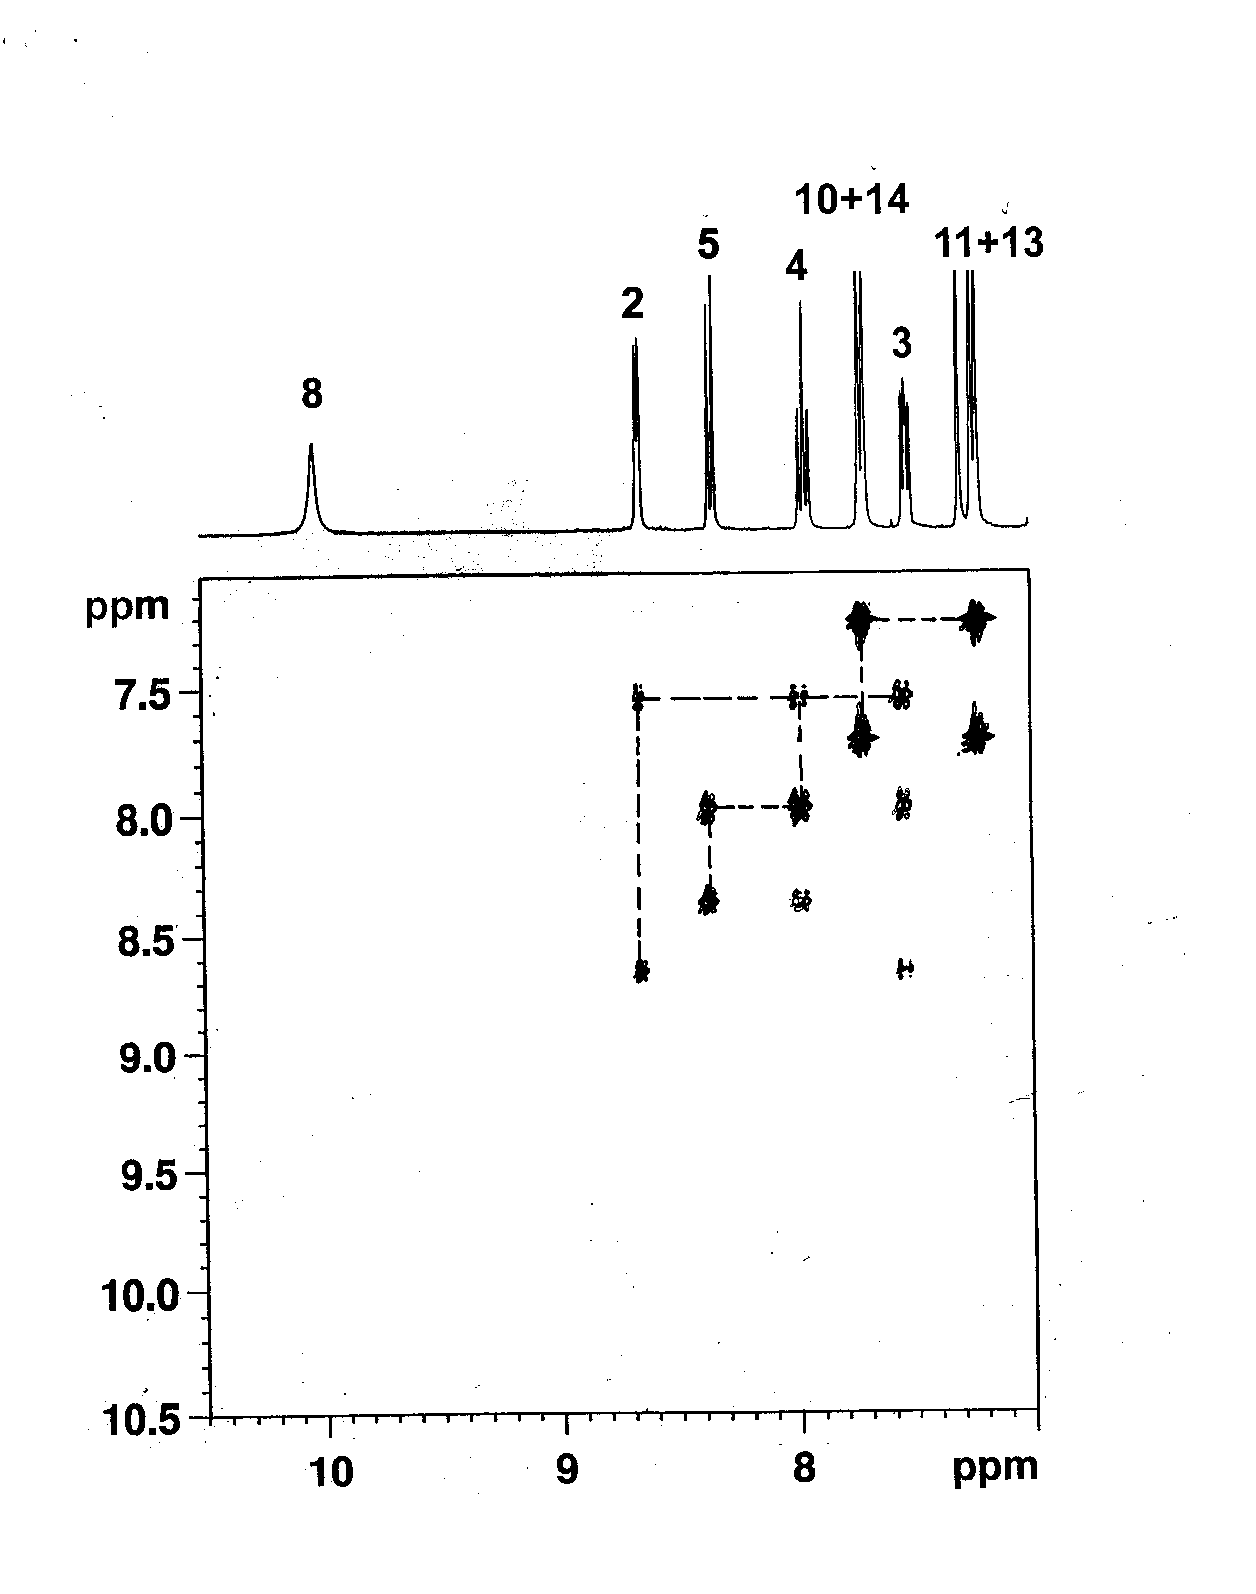
**

Figure S1. The aromatic region of the 2D COSY NMR spectrum of ligand **L** recorded in CDCl3 at 298 K.


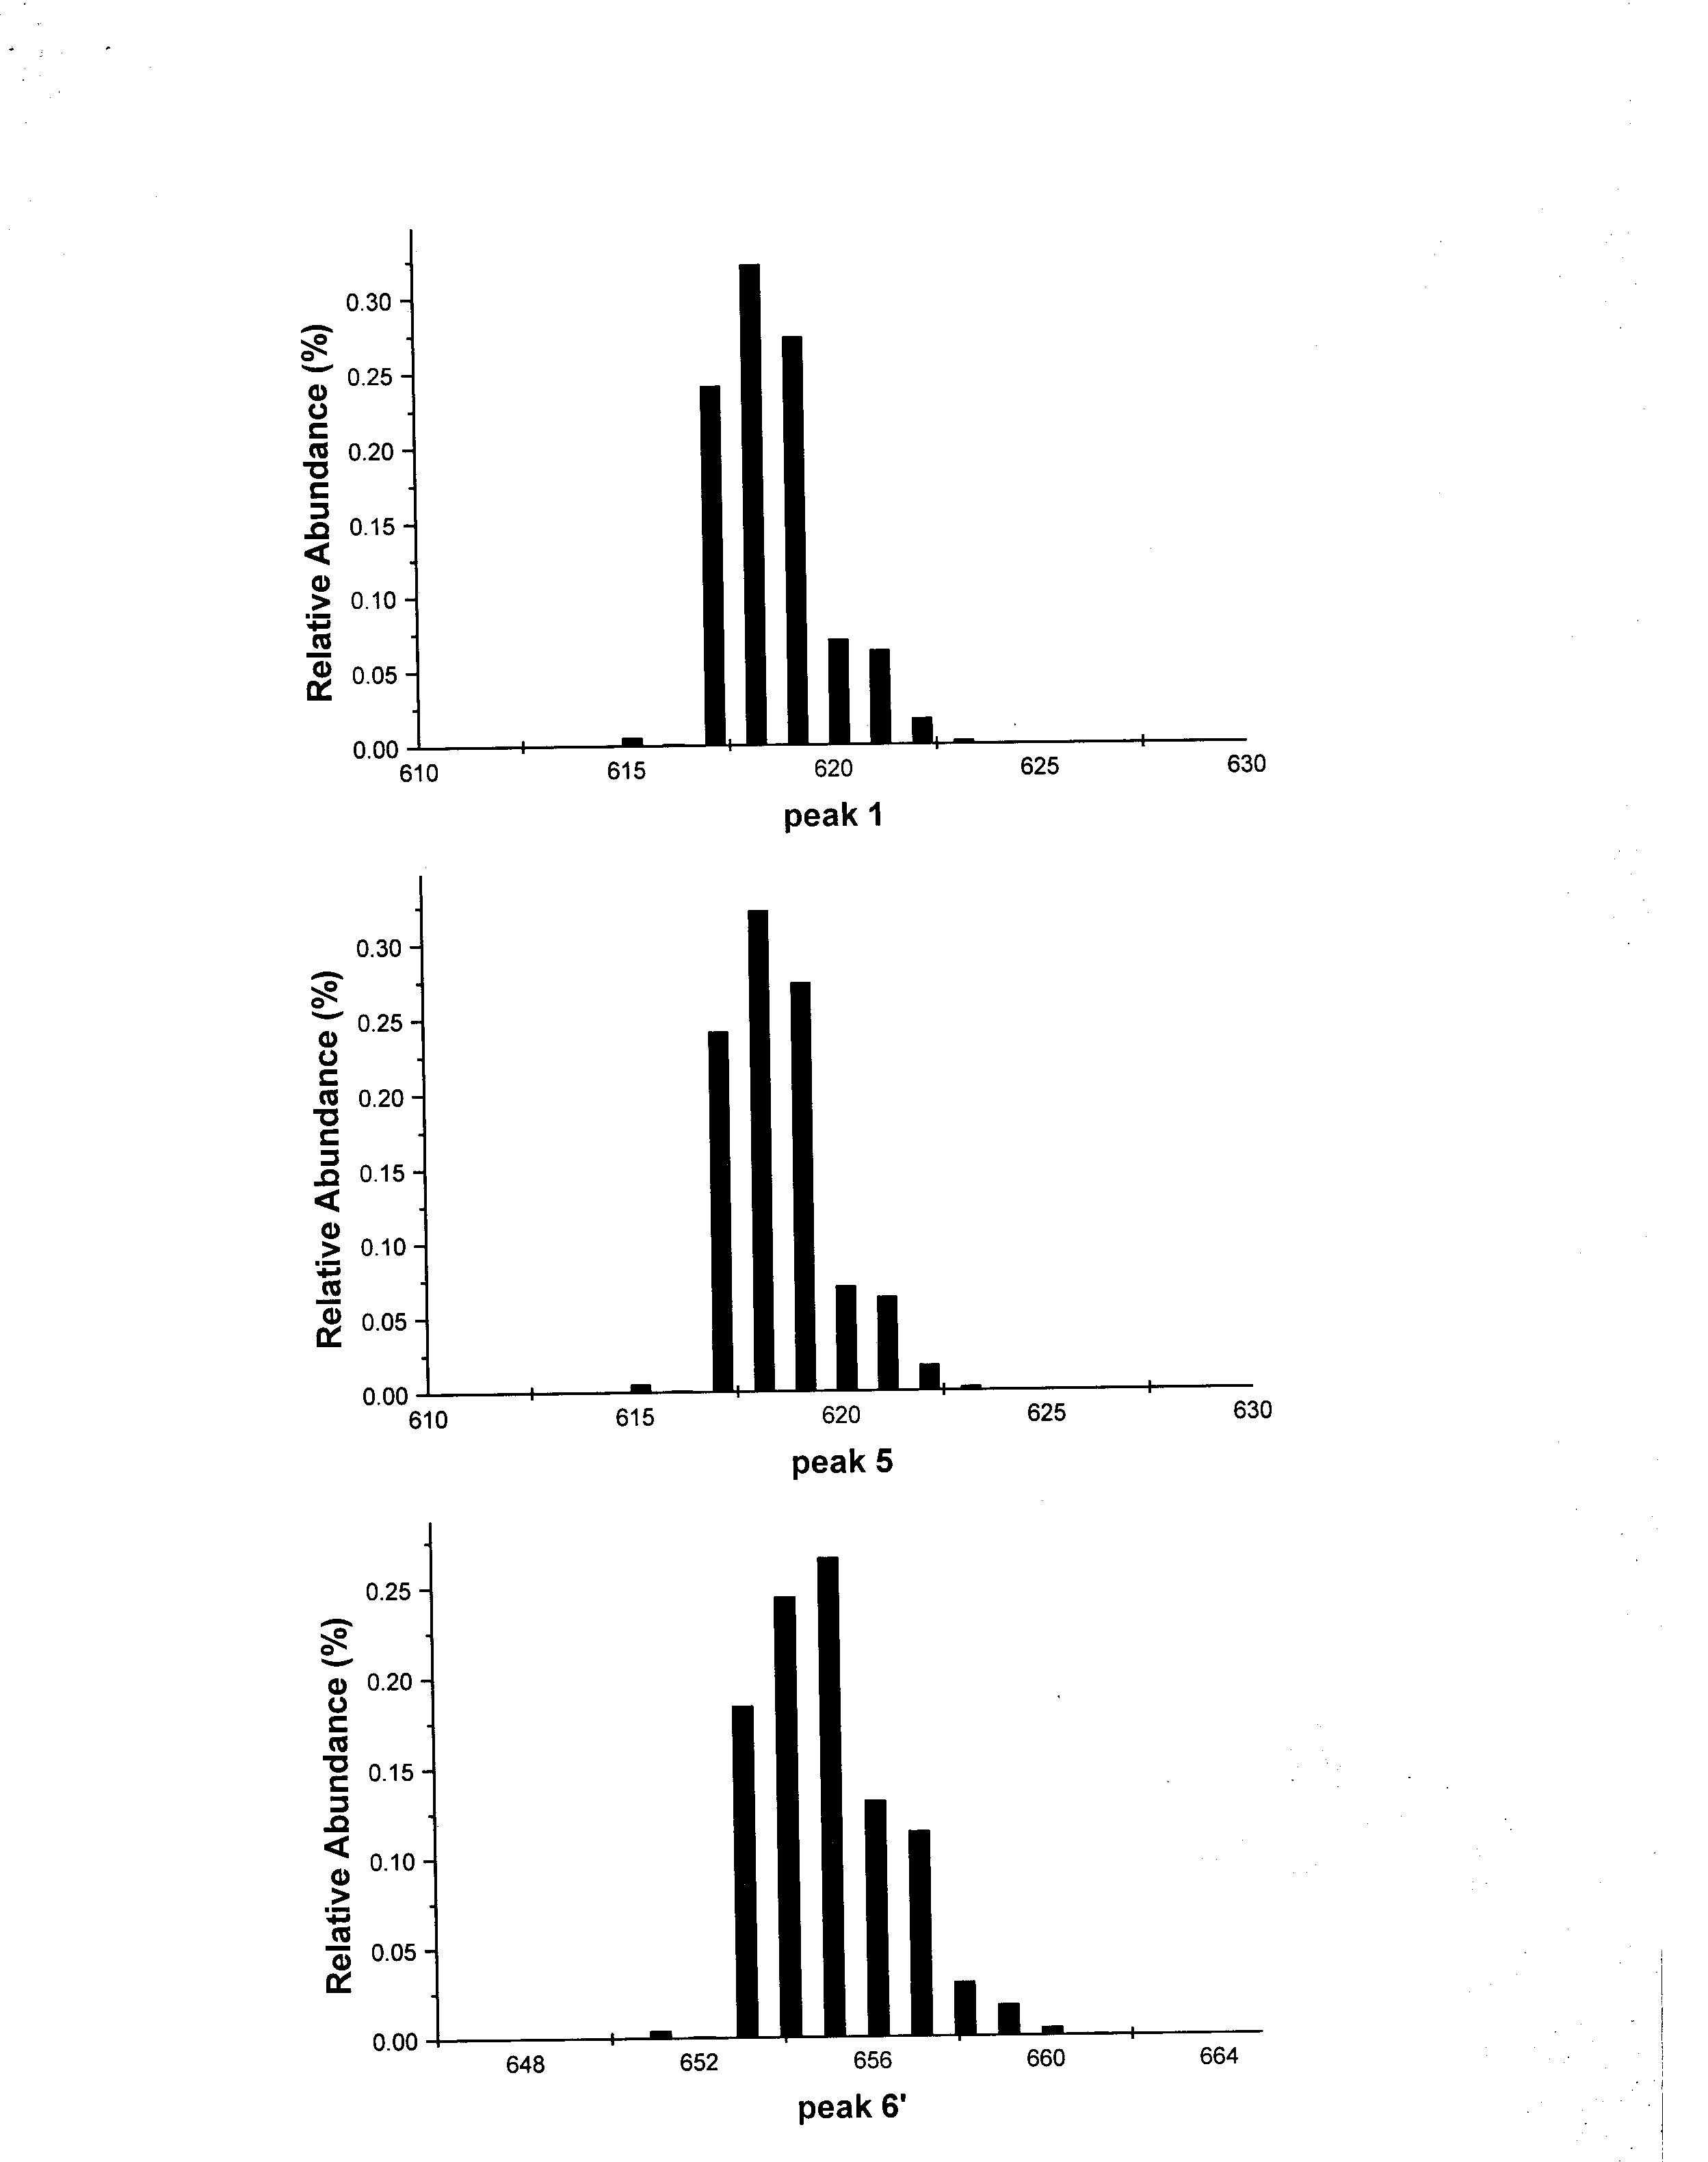
Figure S2. Calculated spectra of peak 1, 5, 6’, 9, 11 and 12.

Fig. S2 contd.


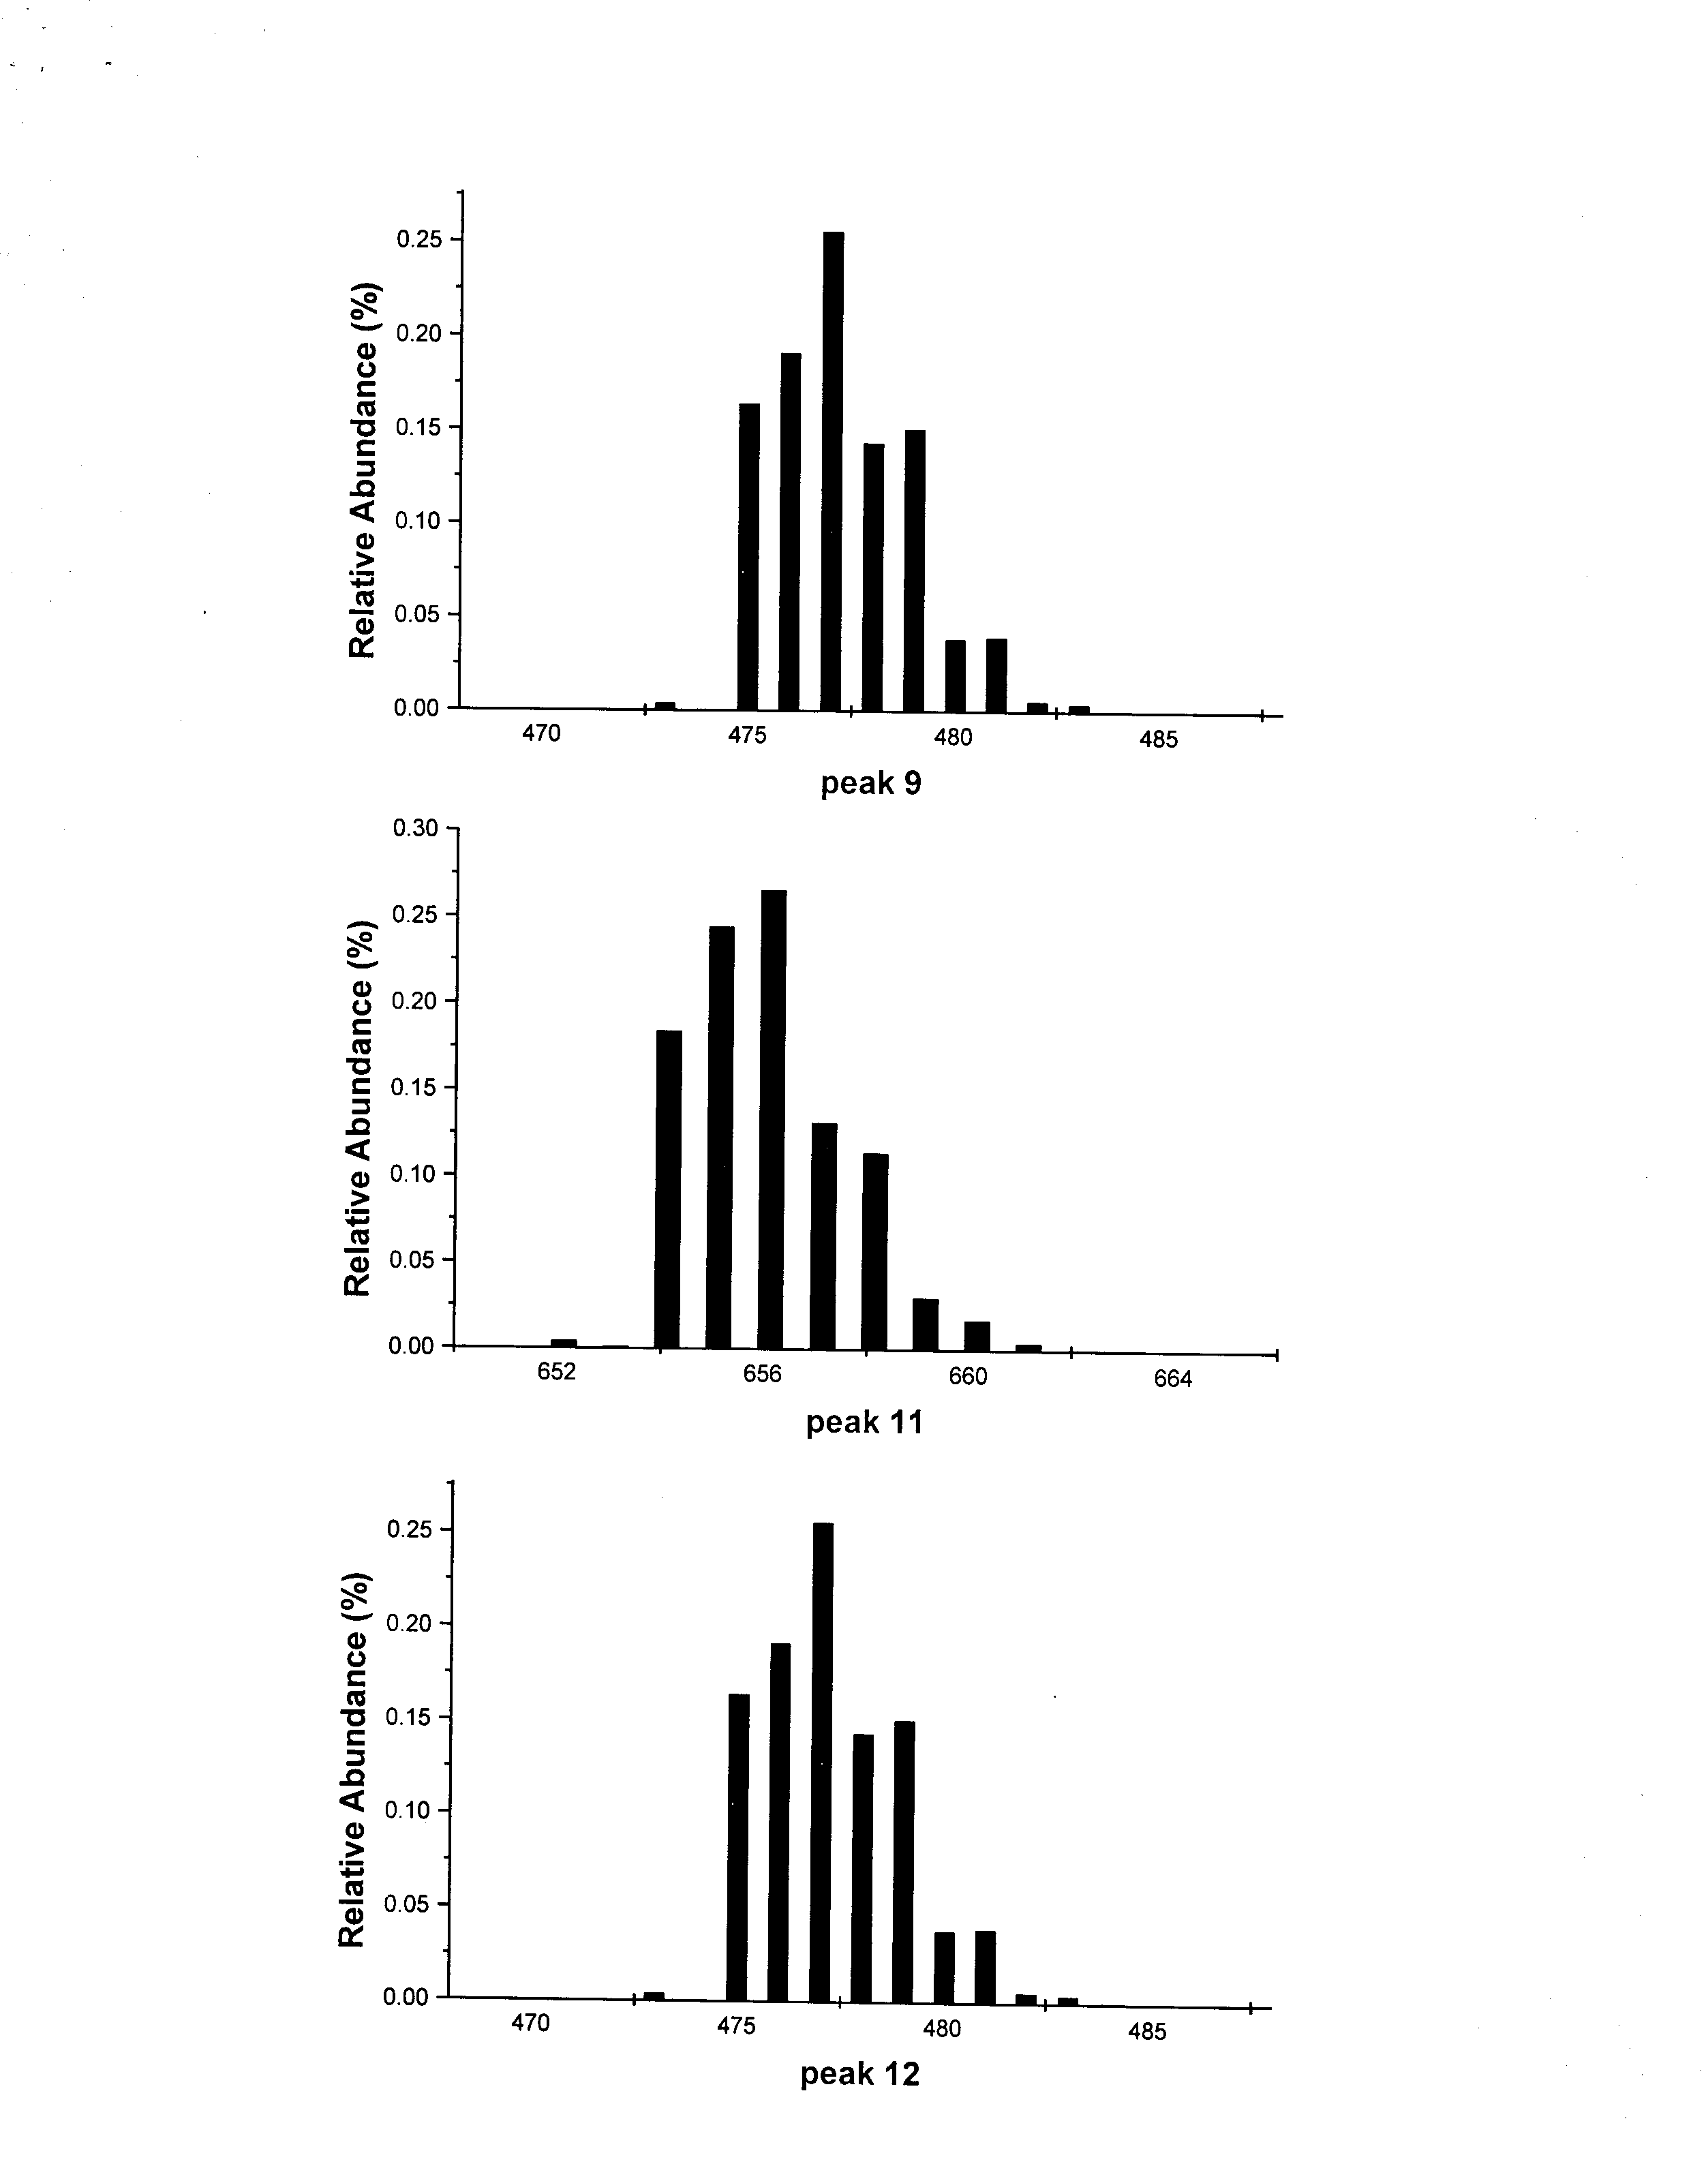


Figure S3. Cytotoxic activity of the reference drug cisplatin against selected tumor cell lines (pM as -log molarity) [■ Human leukaemia cells (HL-60),  Murine leukaemia cells (P388),  Human liver cancer cells (BEL-7402),  Human lung cancer cells (A-549)].
